## Correction: Diagnostic and prognostic utilities of humoral fibulin-3 in malignant pleural mesothelioma: Evidence from a meta-analysis

Dongxu Pei<sup>1</sup>, Yongwei Li<sup>1</sup>, Xinwei Liu<sup>1</sup>, Sha Yan<sup>1</sup>, Xiaolan Guo<sup>1</sup>, Xiaona Xu<sup>1</sup> and Xiaoxia Guo<sup>2</sup>

<sup>1</sup> Department of Clinical Laboratory, Henan Province Hospital of TCM, Zhengzhou, Henan, China

<sup>2</sup> Department of Clinical Laboratory, Anyang Hospital of Traditional Chinese Medicine

**Published:** April 20, 2018

**Copyright:** Pei et al. This is an open-access article distributed under the terms of the Creative Commons Attribution License 3.0 (CC BY 3.0), which permits unrestricted use, distribution, and reproduction in any medium, provided the original author and source are credited.

**This article has been corrected:** The correct author affiliation is given below:

<sup>1</sup> Department of Clinical Laboratory, Henan Province Hospital of TCM, Zhengzhou, Henan, China

Original article: Oncotarget. 2017; 8:13030-13038. <https://doi.org/10.18632/oncotarget.14712>
